# Supplementary material for: Plant Diversity and Distribution Patterns of Populus pruinosa Schrenk (Salicaceae) Floodplain Forests in Kazakhstan
Source: MDPI journal article supplement (doi:10.3390/d15070797), 2023-06-21
Supplement: s1 [file s1]

**Plant diversity and distribution patterns of *Populus pruinosa* Schrenk (Salicaceae) floodplain forests in Kazakhstan**

Dimeyeva et al.

**Supplementary materials**

**Table S1.** Environmental variables used in modeling the ecological niche and identifying the most suitable sites for the restoration of *Populus pruinosa* floodplain forests.

| №  | Environment variable (unit)        | Information source     |                        |                                               |
|----|------------------------------------|------------------------|------------------------|-----------------------------------------------|
|    |                                    | WorldClim<br>1970–2000 | WorldClim<br>2010–2018 | State climate cadastre<br>(norm)<br>1991–2020 |
|    |                                    | Optimal range          |                        |                                               |
| 1  | Minimum temperature (°C) January   | -17.6 – -4.6           | -17.5 – -2.6           | -16.7 – -3.1                                  |
| 2  | Minimum temperature (°C) February  | -16.9 – -3.1           | -16.5 – -2.3           | -13.3 – -3.1                                  |
| 3  | Minimum temperature (°C) March     | -9.2 – +3.1            | -6.8 – +4.9            | -4.4 – +4.2                                   |
| 4  | Minimum temperature (°C) April     | 2.3 – 9.8              | 3.5 – 10.3             | 4.4 – 10.5                                    |
| 5  | Minimum temperature (°C) May       | 8.3 – 15.1             | 8.6 – 16.7             | 10.1 – 16.2                                   |
| 6  | Minimum temperature (°C) June      | 13.4 – 20.1            | 14.6 – 21.1            | 15.5 – 20.8                                   |
| 7  | Minimum temperature (°C) July      | 16.5 – 22              | 16.7 – 22.8            | 17 – 22.5                                     |
| 8  | Minimum temperature (°C) August    | 13.8 – 19.1            | 14.5 – 20.23           | 14.8 – 20.6                                   |
| 9  | Minimum temperature (°C) September | 7.9 – 13               | 8.4 – 14.11            | 8.1 – 14.7                                    |
| 10 | Minimum temperature (°C) October   | -0.1 – 6.1             | 0.5 – 7.2              | 1.5 – 8.5                                     |
| 11 | Minimum temperature (°C) November  | -7 – +0.8              | -6.8 – +0.8            | -5.8 – +2.5                                   |
| 12 | Minimum temperature (°C) December  | -13.5 – -2.4           | -13.8 – -3.0           | -13.1 – -1.9                                  |
| 13 | Maximum temperature (°C) January   | -7.1 – +3.3            | -7.7 – +5.3            | -6.2 – +3.7                                   |
| 14 | Maximum temperature (°C) February  | -5 – +6.6              | -5.3 – +7.1            | -2.3 – +6.8                                   |
| 15 | Maximum temperature (°C) March     | 2 – 13.3               | 4.8 – 15.4             | 7.9 – 14.4                                    |
| 16 | Maximum temperature (°C) April     | 15.5 – 21.6            | 16.7 – 22.3            | 19.3 – 22                                     |
| 17 | Maximum temperature (°C) May       | 23 – 28.5              | 24.0 – 30.1            | 25.2 – 28.7                                   |
| 18 | Maximum temperature (°C) June      | 29 – 34.6              | 30.5 – 35.4            | 30.6 – 34.4                                   |
| 19 | Maximum temperature (°C) July      | 31.8 – 37.5            | 32.1 – 37.5            | 32.7 – 36.6                                   |
| 20 | Maximum temperature (°C) August    | 30 – 35.6              | 30.8 – 36.61           | 31.6 – 35.1                                   |
| 21 | Maximum temperature (°C) September | 24 – 30                | 24.5 – 30.8            | 25 – 29.3                                     |
| 22 | Maximum temperature (°C) October   | 15 – 22                | 15.2 – 21.8            | 16.7 – 21.6                                   |
| 23 | Maximum temperature (°C) November  | 4 – 13                 | 4.6 – 11.9             | 5.5 – 12.1                                    |
| 24 | Maximum temperature (°C) December  | -3.1 – +6              | -3.8 – +5.6            | -3.4 – +5                                     |
| 25 | Average temperature (°C) January   | -12.3 – -0.7           |                        | -11.8 – -0.2                                  |
| 26 | Average temperature (°C) February  | -10.9 – +1.7           |                        | -8.2 – +1.9                                   |
| 27 | Average temperature (°C) March     | -3.6 – +8.2            |                        | 1.2 – 8.6                                     |
| 28 | Average temperature (°C) April     | 8.9 – 15.9             |                        | 11.8 – 15.6                                   |
| 29 | Average temperature (°C) May       | 15.9 – 21.6            |                        | 17.9 – 21.9                                   |
| 30 | Average temperature (°C) June      | 21.6 – 27.2            |                        | 23.1 – 27.2                                   |
| 31 | Average temperature (°C) July      | 24.4 – 29.5            |                        | 25.3 – 29.2                                   |
| 32 | Average temperature (°C) August    | 22.4 – 27.3            |                        | 23.3 – 27.4                                   |
| 33 | Average temperature (°C) September | 16 – 21.1              |                        | 16.4 – 21.4                                   |
| 34 | Average temperature (°C) October   | 7.4 – 13.8             |                        | 8.5 – 14.3                                    |
| 35 | Average temperature (°C) November  | -1.1 – +6.8            |                        | -0.9 – +6.6                                   |
| 36 | Average temperature (°C) December  | -8.2 – +1.8            |                        | -8.5 – +1                                     |
| 37 | Precipitation (mm) January         | 14 – 40                | 16.0 – 39.3            | 8 – 28                                        |
| 38 | Precipitation (mm) February        | 12 – 41                | 13.6 – 42.8            | 8 – 37                                        |

|                          |                                                                 |               |              |         |
|--------------------------|-----------------------------------------------------------------|---------------|--------------|---------|
| 39                       | Precipitation (mm) March                                        | 12 – 44       | 16.0 – 55.1  | 10 – 36 |
| 40                       | Precipitation (mm) April                                        | 16 – 44       | 19.2 – 50.2  | 11 – 36 |
| 41                       | Precipitation (mm) May                                          | 16 – 46       | 13.9 – 40.5  | 12 – 39 |
| 42                       | Precipitation (mm) June                                         | 5 – 37        | 6.7 – 35.4   | 6 – 32  |
| 43                       | Precipitation (mm) July                                         | 4 – 29        | 2.0 – 29.1   | 2 – 34  |
| 44                       | Precipitation (mm) August                                       | 1 – 18        | 2.2 – 21.5   | 1 – 15  |
| 45                       | Precipitation (mm) September                                    | 2 – 20        | 1.7 – 20.4   | 2 – 13  |
| 46                       | Precipitation (mm) October                                      | 8 – 34        | 8.7 – 47.7   | 8 – 25  |
| 47                       | Precipitation (mm) November                                     | 14 – 36       | 15.1 – 40.81 | 16 – 29 |
| 48                       | Precipitation (mm) December                                     | 16 – 48       | 17.8 – 40.81 | 10 – 31 |
| 49                       | Solar radiation (kJ m <sup>-2</sup> day <sup>-1</sup> ) January | 5880 – 7404   |              |         |
| 50                       | Solar radiation February                                        | 9203 – 10382  |              |         |
| 51                       | Solar radiation March                                           | 13130 – 14281 |              |         |
| 52                       | Solar radiation April                                           | 17995 – 18713 |              |         |
| 53                       | Solar radiation May                                             | 21890 – 23942 |              |         |
| 54                       | Solar radiation June                                            | 24236 – 27264 |              |         |
| 55                       | Solar radiation July                                            | 23661 – 27324 |              |         |
| 56                       | Solar radiation August                                          | 21259 – 24604 |              |         |
| 57                       | Solar radiation September                                       | 16187 – 19401 |              |         |
| 58                       | Solar radiation October                                         | 9927 – 12554  |              |         |
| 59                       | Solar radiation November                                        | 6362 – 7994   |              |         |
| 60                       | Solar radiation December                                        | 4683 – 6357   |              |         |
| 61                       | Wind speed (m s <sup>-1</sup> ) January                         | 1.4 – 3.2     |              |         |
| 62                       | Wind speed February                                             | 1.7 – 3.7     |              |         |
| 63                       | Wind speed March                                                | 2.1 – 4       |              |         |
| 64                       | Wind speed April                                                | 2.5 – 4.1     |              |         |
| 65                       | Wind speed May                                                  | 2.4 – 3.7     |              |         |
| 66                       | Wind speed June                                                 | 2.2 – 3.4     |              |         |
| 67                       | Wind speed July                                                 | 2.2 – 3.3     |              |         |
| 68                       | Wind speed August                                               | 2 – 3.4       |              |         |
| 69                       | Wind speed September                                            | 1.8 – 3.2     |              |         |
| 70                       | Wind speed October                                              | 1.8 – 3       |              |         |
| 71                       | Wind speed November                                             | 1.7 – 3.2     |              |         |
| 72                       | Wind speed December                                             | 1.6 – 3.1     |              |         |
| 73                       | Water vapor pressure March                                      | 0.36 – 0.67   |              |         |
| 74                       | Water vapor pressure April                                      | 0.55 – 0.97   |              |         |
| 75                       | Water vapor pressure May                                        | 0.81 – 1.16   |              |         |
| 76                       | Water vapor pressure June                                       | 1 – 1.27      |              |         |
| 77                       | Water vapor pressure July                                       | 1.13 – 1.42   |              |         |
| 78                       | Water vapor pressure August                                     | 0.94 – 1.26   |              |         |
| <b>BioClim 1970-2000</b> |                                                                 |               |              |         |
| 79                       | Annual Mean Temperature                                         |               | 6.68 – 14.46 |         |
| 80                       | Mean Diurnal Range (Mean of monthly (max temp - min temp))      |               | 12.3 – 13.7  |         |
| 81                       | Isothermality (BIO2/BIO7) (×100)                                |               | 26.5 – 31.43 |         |
| 82                       | Temperature Seasonality (standard deviation ×100)               |               | 1063 – 1355  |         |
| 83                       | Max Temperature of Warmest Month                                |               | 31.9 – 37.3  |         |
| 84                       | Min Temperature of Coldest Month                                |               | -17.6 – -4.6 |         |
| 85                       | Temperature Annual Range (BIO5-BIO6)                            |               | 41 – 49.8    |         |
| 86                       | Mean Temperature of Wettest Quarter                             |               | -4.04 – 17.9 |         |
| 87                       | Mean Temperature of Driest Quarter                              |               | -2.3 – 26.1  |         |
| 88                       | Mean Temperature of Warmest Quarter                             |               | 22.7 – 28    |         |

|                                  |                                                      |                                 |
|----------------------------------|------------------------------------------------------|---------------------------------|
| 89                               | Mean Temperature of Coldest Quarter                  | -10.6 – 1                       |
| 90                               | Annual Precipitation                                 | 128 – 328                       |
| 91                               | Precipitation of Wettest Month                       | 17 – 48                         |
| 92                               | Precipitation of Driest Month                        | 1 – 17                          |
| 93                               | Precipitation Seasonality (Coefficient of Variation) | 30.05 – 66.3                    |
| 94                               | Precipitation of Wettest Quarter                     | 46 – 129                        |
| 95                               | Precipitation of Driest Quarter                      | 8 – 59                          |
| 96                               | Precipitation of Warmest Quarter                     | 12 – 83                         |
| 97                               | Precipitation of Coldest Quarter                     | 42 – 129                        |
| <b>Other information sources</b> |                                                      |                                 |
| 98                               | Elevation (m) (height above sea level)               | 112 – 622 (SRTM) 79-717 m (GPS) |
| 99                               | Soil (soil maps)                                     | Floodplain meadow-forest soils  |
| 100                              | Normalized difference vegetation index (NDVI)        | 0.28 – 0.65 (Sentinel-2)        |
| 101                              | Distance to water (Sentinel-2)                       | 0 – 17 km                       |
| 102                              | Distance to settlements (Sentinel-2)                 | 0.17 – 41.8 km                  |

**Table S2.** List of vascular plants of *Populus pruinosa* communities in the Ili and in the Syr Darya river valleys.

| Families / Species                                     | Distribution         |                            |
|--------------------------------------------------------|----------------------|----------------------------|
|                                                        | The Ili River Valley | The Syr Darya River Valley |
| Amaranthaceae Juss.                                    |                      |                            |
| <i>Amaranthus blitoides</i> S. Watson                  | +                    | -                          |
| <i>Anabasis salsa</i> (Ledeb.) Benth. ex Volkens       | +                    | -                          |
| <i>Atriplex cana</i> Ledeb.                            | +                    | -                          |
| <i>Atriplex sagittata</i> Borkh.                       | -                    | +                          |
| <i>Atriplex tatarica</i> L.                            | +                    | +                          |
| <i>Bassia eriophora</i> (Schrader) Asch.               | -                    | +                          |
| <i>Bassia hyssopifolia</i> (Pall.) Kuntze              | +                    | -                          |
| <i>Bassia prostrata</i> (L.) Beck                      | +                    | +                          |
| <i>Bassia sedoides</i> Asch.                           | +                    | -                          |
| <i>Camphorosma monspeliaca</i> L.                      | +                    | -                          |
| <i>Ceratocarpus arenarius</i> L.                       | +                    | +                          |
| <i>Chenopodium album</i> L.                            | +                    | -                          |
| <i>Climacoptera lanata</i> (Pall.) Botsch.             | +                    | +                          |
| <i>Climacoptera obtusifolia</i> (Schrenk) Botsch.      | -                    | +                          |
| <i>Halostachys belangeriana</i> (Moq.) Botsch.         | -                    | +                          |
| <i>Haloxylon ammodendron</i> (C.A.Mey.) Bunge ex Fenzl | +                    | +                          |
| <i>Kalidium foliatum</i> (Pall.) Moq.                  | +                    | -                          |
| <i>Krascheninnikovia ceratoides</i> (L.) Gueldenst.    | +                    | -                          |
| <i>Petrosimonia sibirica</i> (Pall.) Bunge             | +                    | +                          |
| <i>Salsola arbuscula</i> Pall                          | -                    | +                          |
| <i>Salsola arbusculiformis</i> Drobow                  | +                    | -                          |
| <i>Salsola kali</i> subsp. <i>tragus</i> (L.) Čelak.   | -                    | +                          |
| <i>Salsola nitraria</i> Pall.                          | +                    | +                          |
| <i>Salsola paulsenii</i> Litv.                         | +                    | +                          |
| <i>Suaeda altissima</i> (L.) Pall.                     | -                    | +                          |
| <i>Suaeda linifolia</i> Pall.                          | -                    | +                          |
| <i>Suaeda microphylla</i> Pall.                        | +                    | +                          |
| Amaryllidaceae J.St.-Hil.                              |                      |                            |

|                                                                              |   |   |
|------------------------------------------------------------------------------|---|---|
| <i>Allium caesium</i> Schrenk                                                | + | - |
| <i>Allium decipiens</i> Fisch. ex Schult. & Schult.f.                        | + | - |
| <i>Allium galanthum</i> Kar. & Kir.                                          | + | - |
| <i>Allium lineare</i> L.                                                     | - | + |
| Apiaceae Lindl.                                                              |   |   |
| <i>Elwendia setacea</i> (Schrenk) Pimenov & Kljuykov                         | + | - |
| <i>Ferula iliensis</i> Krasn. ex Korovin                                     | + | - |
| <i>Ferula lehmannii</i> Boiss.                                               | - | + |
| <i>Ferula ovina</i> (Boiss.) Boiss.                                          | + | - |
| <i>Ferula songarica</i> Pall. ex Schult                                      | + | - |
| <i>Ferula teterrima</i> Kar. & Kir.                                          | + | - |
| <i>Oedibasis apiculata</i> (Kar. & Kir.) Koso-Pol.                           | + | - |
| <i>Prangos arenaria</i> Pimenov                                              | + | - |
| Apocynaceae Juss.                                                            |   |   |
| <i>Apocynum venetum</i> subsp. <i>lancifolium</i> (Russanov) ined.           | + | + |
| <i>Cynanchum acutum</i> subsp. <i>sibiricum</i> (Willd.) Rech.f.             | + | + |
| Asparagaceae Juss.                                                           |   |   |
| <i>Asparagus brachyphyllus</i> Turcz                                         | - | + |
| <i>Asparagus breslerianus</i> Schult. & Schult.f.                            | - | + |
| <i>Asparagus persicus</i> Baker                                              | + | - |
| <i>Asparagus neglectus</i> Kar. & Kir.                                       | + | - |
| Asteraceae Giseke                                                            |   |   |
| <i>Amberboa turanica</i> Iljin                                               | - | + |
| <i>Artemisia diffusa</i> Krasch. ex Poljakov                                 | - | + |
| <i>Artemisia leucodes</i> Schrenk                                            | + | - |
| <i>Artemisia pauciflora</i> Weber ex Stechm.                                 | + | - |
| <i>Artemisia schrenkiana</i> Ledeb.                                          | + | + |
| <i>Artemisia scoparia</i> Waldst. & Kit.                                     | + | - |
| <i>Artemisia serotina</i> Bunge                                              | + | - |
| <i>Artemisia sublessingiana</i> Krasch. ex Poljakov                          | + | - |
| <i>Artemisia terrae-albae</i> Krasch.                                        | + | + |
| <i>Artemisia turanica</i> Krasch.                                            | + | + |
| <i>Centaurea pseudosquarrosa</i> Mikheev ex Gabrieljan et Mikheev            | + | - |
| <i>Centaurea pulchella</i> Ledeb.                                            | + | + |
| <i>Cirsium arvense</i> (L.) Scop.                                            | + | + |
| <i>Cousinia erectispina</i> Tscherneva                                       | - | + |
| <i>Cousinia tenella</i> Fisch. & C. A. Mey.                                  | + | + |
| <i>Epilasia acrolasia</i> (Bunge) Lipsch                                     | - | + |
| <i>Erigeron canadensis</i> L.                                                | - | + |
| <i>Galatella fastigiiformis</i> Novopokr.                                    | + | - |
| <i>Karelinia caspia</i> (Pall.) Less.                                        | + | + |
| <i>Koelpinia linearis</i> Pall.                                              | - | + |
| <i>Lactuca serriola</i> L.                                                   | + | + |
| <i>Lactuca tatarica</i> C.A. Mey.                                            | + | - |
| <i>Microcephala lamellata</i> (Bunge) Pobed.                                 | - | + |
| <i>Onopordum acanthium</i> L.                                                | + | - |
| <i>Pentanema caspicum</i> (F.K.Blum ex Ledeb.) G.V.Boiko, Korniy. & Mosyakin | - | + |
| <i>Rhaponticum repens</i> (L.) Hidalgo                                       | + | + |
| <i>Senecio erucifolius</i> L.                                                | - | + |
| <i>Seriphidium diffusum</i> (Krasch. ex Poljak.) Y.R. Ling                   | - | + |

|                                                                                 |   |   |
|---------------------------------------------------------------------------------|---|---|
| <i>Sonchus arvensis</i> L.                                                      | + | - |
| <i>Takhtajaniantha pusilla</i> (Pall.) Nazarova                                 | - | + |
| <i>Taraxacum bessarabicum</i> (Hornem.) Hand.-Mazz.                             | - | + |
| <i>Taraxacum officinale</i> F.H. Wigg.                                          | + | - |
| <i>Taraxacum glaucanthum</i> (Ledeb.) DC.                                       | + | - |
| <i>Tragopogon ruber</i> S.G. Gmel.                                              | + | - |
| <i>Tripolium pannonicum</i> (Jacq.) Dobrocz.                                    | - | + |
| <i>Xanthium strumarium</i> L.                                                   | + | + |
| Berberidaceae Juss.                                                             |   |   |
| <i>Berberis iliensis</i> Popov                                                  | + | - |
| Boraginaceae Juss.                                                              |   |   |
| <i>Arnebia decumbens</i> (Vent.) Coss. & Kralik                                 | + | - |
| <i>Asperugo procumbens</i> L.                                                   | + | + |
| <i>Heliotropium dasycarpum</i> Ledeb. ex Eichw.                                 | - | + |
| <i>Pseudoheterocaryum szovitsianum</i> (Fisch. & C.A.Mey.) Kaz.Osaloo & Saadati | + | - |
| <i>Lappula marginata</i> (M.Bieb.) Gürke                                        | + | - |
| <i>Lappula spinocarpos</i> (Forssk.) Asch. ex Kuntze                            | - | + |
| <i>Nonea caspica</i> (Willd.) G. Don                                            | + | + |
| <i>Rochelia disperma</i> subsp. <i>retorta</i> (Pall.) Kotejowa                 | + | - |
| Brassicaceae Burnett                                                            |   |   |
| <i>Alyssum dasycarpum</i> Stephan ex Willd.                                     | - | + |
| <i>Alyssum desertorum</i> Stapf                                                 | + | - |
| <i>Alyssum stenostachyum</i> Botsch. & Vved.                                    | + | - |
| <i>Arabidopsis thaliana</i> (L.) Heynh.                                         | + | - |
| <i>Camelina microcarpa</i> Andr. ex DC.                                         | + | - |
| <i>Chorispora tenella</i> (Pall.) DC.                                           | - | + |
| <i>Descurainia sophia</i> (L.) Webb ex Prantl                                   | + | + |
| <i>Goldbachia laevigata</i> (M. Bieb.) DC.                                      | - | + |
| <i>Lepidium aucheri</i> Boiss.                                                  | - | + |
| <i>Lepidium draba</i> L.                                                        | + | - |
| <i>Lepidium latifolium</i> L.                                                   | + | - |
| <i>Lepidium obtusum</i> Basiner                                                 | - | + |
| <i>Lepidium perfoliatum</i> L.                                                  | + | - |
| <i>Leptaleum filifolium</i> (Willd.) DC.                                        | - | + |
| <i>Malcolmia africana</i> (L.) R.Br.                                            | + | + |
| <i>Meniocus linifolius</i> (Stephan ex Willd.) DC.                              | + | + |
| <i>Olimarabidopsis pumila</i> (Celak.) Al-Shehbaz, O'Kane & R.A. Price          | - | + |
| <i>Strigosella brevipes</i> (Bunge) Botsch.                                     | - | + |
| <i>Tauscheria lasiocarpa</i> Fisch. ex DC.                                      | - | + |
| Cannabaceae Martinov                                                            |   |   |
| <i>Cannabis sativa</i> L.                                                       | + | - |
| Caryophyllaceae Juss.                                                           |   |   |
| <i>Acanthophyllum pungens</i> Boiss.                                            | - | + |
| <i>Arenaria serpyllifolia</i> subsp. <i>leptoclados</i> (Rchb.) Nyman           | + | - |
| <i>Gypsophila paniculata</i> L.                                                 | - | + |
| <i>Gypsophila perfoliata</i> L.                                                 | + | - |
| <i>Holosteum polygamum</i> K. Koch                                              | + | - |
| Convolvulaceae Juss.                                                            |   |   |
| <i>Calystegia sepium</i> (L.) R. Br.                                            | + | - |
| <i>Cuscuta europaea</i> L.                                                      | - | + |

|                                                                        |   |   |
|------------------------------------------------------------------------|---|---|
| Cynomoriaceae Endl. ex Lindl.                                          |   |   |
| <i>Cynomorium coccineum</i> subsp. <i>songaricum</i> (Rupr.) J.Léonard | + | - |
| Cyperaceae Juss.                                                       |   |   |
| <i>Bolboschoenus maritimus</i> (L.) Palla                              | - | + |
| <i>Bolboschoenus planiculmis</i> (F.Schmidt) T.V.Egorova               | + | - |
| <i>Carex diluta</i> M. Bieb.                                           | + | - |
| <i>Carex pachystylis</i> J. Gay                                        | + | - |
| <i>Carex saxatilis</i> L.                                              | - | + |
| <i>Schoenoplectus litoralis</i> (Schrad.) Palla                        | + | - |
| Elaeagnaceae Juss.                                                     |   |   |
| <i>Elaeagnus angustifolia</i> L.                                       | + | + |
| Ephedraceae Dumort.                                                    |   |   |
| <i>Ephedra distachya</i> L.                                            | + | - |
| <i>Ephedra equisetina</i> Bunge                                        | + | - |
| <i>Ephedra lomatolepis</i> Schrenk                                     | + | - |
| Euphorbiaceae Juss.                                                    |   |   |
| <i>Euphorbia esula</i> L.                                              | + | + |
| <i>Euphorbia seguieriana</i> Neck.                                     | - | + |
| <i>Euphorbia soongarica</i> Boiss.                                     | + | - |
| <i>Euphorbia turczaninowii</i> Kar. & Kir.                             | - | + |
| Fabaceae Juss.                                                         |   |   |
| <i>Alhagi kirghisorum</i> Schrenk                                      | + | - |
| <i>Alhagi pseudalhagi</i> (M. Bieb.) Desv. ex B. Keller & Shap.        | + | + |
| <i>Caragana halodendron</i> (Pall.) Dum.Cours.                         | + | + |
| <i>Astragalus campylorrhynchus</i> Fisch. & C.A.Mey.                   | - | + |
| <i>Astragalus orbiculatus</i> Ledeb.                                   | - | + |
| <i>Glycyrrhiza glabra</i> L.                                           | + | + |
| <i>Glycyrrhiza uralensis</i> Fisch.                                    | + | - |
| <i>Sophora alopecuroides</i> L.                                        | + | + |
| <i>Sphaerophysa salsula</i> (Pall.) DC.                                | + | - |
| <i>Medicago medicaginoides</i> (Retz.) E.Small                         | + | - |
| <i>Medicago orthoceras</i> (Kar. & Kir.) Trautv                        | + | - |
| <i>Vicia cracca</i> L.                                                 | + | - |
| Geraniaceae Juss.                                                      |   |   |
| <i>Erodium oxyrhinchum</i> M.Bieb.                                     | + | - |
| Iridaceae Juss.                                                        |   |   |
| <i>Iris halophila</i> var. <i>sogdiana</i> (Bunge) Grubov              | + | - |
| <i>Iris tenuifolia</i> Pall.                                           | - | + |
| Juncaceae Juss.                                                        |   |   |
| <i>Juncus gerardii</i> Loisel.                                         | - | + |
| Lamiaceae Martinov                                                     |   |   |
| <i>Marrubium anisodon</i> K.Koch                                       | + | - |
| <i>Ziziphora tenuior</i> L.                                            | + | - |
| Liliaceae Juss.                                                        |   |   |
| <i>Gagea bergii</i> Litv.                                              | - | + |
| <i>Gagea bulbifera</i> (Pall.) Salisb.                                 | + | - |
| <i>Gagea setifolia</i> Baker                                           | + | - |
| <i>Tulipa behmiana</i> Regel                                           | + | - |
| <i>Tulipa biflora</i> Pall.                                            | + | + |
| <i>Tulipa borszczowii</i> Regel                                        | - | + |
| <i>Tulipa kolpakowskiana</i> Regel                                     | + | - |

|                                                                   |   |   |
|-------------------------------------------------------------------|---|---|
| Mazaceae Reveal                                                   |   |   |
| <i>Dodartia orientalis</i> L.                                     | + | + |
| Nitrariaceae Lindl.                                               |   |   |
| <i>Nitraria schoberi</i> L.                                       | + | + |
| <i>Nitraria sibirica</i> Pall.                                    | + | - |
| <i>Peganum harmala</i> L.                                         | - | + |
| Orobanchaceae Vent.                                               |   |   |
| <i>Cistanche salsa</i> (C.A. Mey.) Beck                           | - | + |
| Papaveraceae Juss.                                                |   |   |
| <i>Corydalis schanginii</i> (Pall.) B. Fedtsch.                   | - | + |
| <i>Hypecoum pendulum</i> L.                                       | + | + |
| <i>Papaver pavoninum</i> C. A. Mey.                               | + | + |
| Phyllanthaceae Martinov                                           |   |   |
| <i>Andrachne telephioides</i> L.                                  | + | - |
| Plantaginaceae Juss.                                              |   |   |
| <i>Veronica campylopoda</i> Boiss.                                | + | + |
| Plumbaginaceae Juss.                                              |   |   |
| <i>Limonium gmelinii</i> (Willd.) Kuntze                          | + | - |
| <i>Limonium otolepis</i> Kuntze                                   | + | + |
| Poaceae Barnhart                                                  |   |   |
| <i>Aegilops cylindrica</i> Host                                   | + | - |
| <i>Aegilops tauschii</i> Coss.                                    | + | - |
| <i>Aeluropus littoralis</i> (Gouan) Parl.                         | + | + |
| <i>Agropyron desertorum</i> (Fisch. ex Link) Schult               | + | - |
| <i>Apera interrupta</i> (L.) P. Beauv.                            | + | - |
| <i>Bromus tectorum</i> L.                                         | + | - |
| <i>Bromus squarrosus</i> L.                                       | + | + |
| <i>Calamagrostis epigejos</i> (L.) Roth                           | + | + |
| <i>Elymus repens</i> (L.) Gould                                   | + | + |
| <i>Elymus schrenkianus</i> (Fisch. & C.A.Mey.) Tzvelev            | + | - |
| <i>Eremopyrum bonaepartis</i> (Spreng.) Nevski                    | + | + |
| <i>Eremopyrum orientale</i> (L.) Jaub. & Spach                    | + | + |
| <i>Eremopyrum triticeum</i> (Gaertn.) Nevski                      | + | + |
| <i>Leymus angustus</i> (Trin.) Pilg.                              | + | - |
| <i>Leymus multicaulis</i> (Kar. & Kir.) Tzvelev                   | + | + |
| <i>Phragmites australis</i> (Cav.) Trin. ex Steud.                | + | + |
| <i>Poa bulbosa</i> L.                                             | + | - |
| <i>Stipa arabica</i> Trin. & Rupr.                                | + | - |
| <i>Stipa orientalis</i> Trin. ex Ledeb.                           | + | - |
| <i>Neotrinia splendens</i> (Trin.) M.Nobis, P.D.Gudkova & A.Nowak | + | - |
| Polygonaceae Juss.                                                |   |   |
| <i>Atraphaxis compacta</i> Ledeb.                                 | + | - |
| <i>Atraphaxis spinosa</i> L.                                      | + | - |
| <i>Calligonum aphyllum</i> Gürke                                  | - | + |
| <i>Calligonum leucocladum</i> (Schrenk) Bunge                     | + | - |
| <i>Persicaria hydropiper</i> (L.) Delarbre                        | - | + |
| <i>Polygonum aviculare</i> L.                                     | + | + |
| <i>Polygonum patulum</i> M. Bieb.                                 | + | - |
| Primulaceae Batsch ex Borkh.                                      |   |   |
| <i>Androsace maxima</i> L.                                        | + | - |
| Ranunculaceae Juss.                                               |   |   |

|                                                            |   |   |
|------------------------------------------------------------|---|---|
| <i>Ceratocephala testiculata</i> (Crantz) Besser           | + | + |
| <i>Clematis orientalis</i> L.                              | + | + |
| Rosaceae Juss.                                             |   |   |
| <i>Rosa beggeriana</i> Schrenk ex Fisch. & C.A. Mey.       | + | - |
| <i>Spiraea crenata</i> L.                                  | + | - |
| <i>Spiraea hypericifolia</i> L.                            | + | - |
| Rubiaceae Juss.                                            |   |   |
| <i>Galium aparine</i> L.                                   | + | - |
| <i>Galium spurium</i> L.                                   | - | + |
| <i>Galium verum</i> subsp. <i>verum</i> L.                 | + | - |
| Rutaceae Juss.                                             |   |   |
| <i>Haplophyllum perforatum</i> Kar. & Kir.                 | + | - |
| <i>Haplophyllum lasianthum</i> Bunge                       | - | + |
| Salicaceae Mirb.                                           |   |   |
| <i>Populus euphratica</i> Oliv.                            | + | + |
| <i>Populus pruinosa</i> Schrenk                            | + | + |
| <i>Salix alba</i> L.                                       | - | + |
| <i>Salix songarica</i> Andersson                           | + | + |
| <i>Salix wilhelmsiana</i> M. Bieb.                         | - | + |
| Solanaceae Adans.                                          |   |   |
| <i>Hyoscyamus niger</i> L.                                 | + | - |
| <i>Lycium dasystemum</i> Pojark.                           | + | + |
| <i>Lycium ruthenicum</i> Murr.                             | + | + |
| <i>Solanum dulcamara</i> L.                                | + | + |
| Tamaricaceae Link                                          |   |   |
| <i>Tamarix elongata</i> Ledeb.                             | - | + |
| <i>Tamarix hispida</i> Willd.                              | + | - |
| <i>Tamarix laxa</i> Willd.                                 | + | + |
| <i>Tamarix ramosissima</i> Ledeb.                          | + | + |
| Thymelaeaceae Juss.                                        |   |   |
| <i>Diarthron vesiculosum</i> (Fisch. & C.A.Mey.) C.A. Mey. | + | - |
| Zygophyllaceae R.Br.                                       |   |   |
| <i>Zygophyllum brachypterum</i> Kar. & Kir.                | + | - |
| <i>Zygophyllum fabago</i> L.                               | + | + |

**Table S3.** Forestry characteristics of turanga communities in the Ili and the Syr Darya River Valleys.

| Parameter                              | Location                   |                               |                                 |                                  |
|----------------------------------------|----------------------------|-------------------------------|---------------------------------|----------------------------------|
|                                        | The Ili River Valley       |                               |                                 |                                  |
| Coordinates,<br>height above sea level | N 45°03' E 75°17'<br>329 m | N 43°52' E<br>78°23'<br>573 m | N 43°54' E<br>78°33'<br>715 m   | N 43°47' E<br>78°24'<br>418 m    |
| Relief                                 | above – floodplain terrace |                               | foothill<br>undulating<br>plain | above –<br>floodplain<br>terrace |
| Soils                                  | floodplain meadow-forest   |                               | forest-meadow                   | floodplain<br>meadow-<br>forest  |
| Plant community                        | forb-shrub-turanga         | tall-grass-<br>turanga        | forb-shrub-<br>turanga          | grass-turanga                    |



|                                                                    |                                                                                                                                                                                                                                                   |                                                                                                                                                                                                                                                                                                                    |                                                                                                                                                                                                                                                                                                                  |                                                                                                                                                                                                 |
|--------------------------------------------------------------------|---------------------------------------------------------------------------------------------------------------------------------------------------------------------------------------------------------------------------------------------------|--------------------------------------------------------------------------------------------------------------------------------------------------------------------------------------------------------------------------------------------------------------------------------------------------------------------|------------------------------------------------------------------------------------------------------------------------------------------------------------------------------------------------------------------------------------------------------------------------------------------------------------------|-------------------------------------------------------------------------------------------------------------------------------------------------------------------------------------------------|
| Total projective coverage, %                                       | 70                                                                                                                                                                                                                                                | 90 – 95                                                                                                                                                                                                                                                                                                            | 70                                                                                                                                                                                                                                                                                                               | 90 – 100                                                                                                                                                                                        |
| Size of the test site, m                                           | 20 × 20                                                                                                                                                                                                                                           | 80 × 45                                                                                                                                                                                                                                                                                                            | 50 × 10                                                                                                                                                                                                                                                                                                          | 50 × 10                                                                                                                                                                                         |
| Tree layer: height (h), m, average diameter (d), cm                | h = 9 – 12, d = 39                                                                                                                                                                                                                                | h = 12 – 14, d = 27                                                                                                                                                                                                                                                                                                | h = 12 – 13, d = 25                                                                                                                                                                                                                                                                                              | h = 10 – 12, d = 29                                                                                                                                                                             |
| Composition of the stand                                           | <i>Populus pruinosa</i>                                                                                                                                                                                                                           | <i>Populus pruinosa</i> ,<br><i>Elaeagnus angustifolia</i>                                                                                                                                                                                                                                                         | <i>Populus pruinosa</i> ,<br><i>Elaeagnus angustifolia</i>                                                                                                                                                                                                                                                       | <i>Populus pruinosa</i> ,<br><i>Elaeagnus angustifolia</i>                                                                                                                                      |
| Closeness of the stand                                             | 0.6                                                                                                                                                                                                                                               | 0.3                                                                                                                                                                                                                                                                                                                | 0.5                                                                                                                                                                                                                                                                                                              | 0.3-0.4                                                                                                                                                                                         |
| Bonitet, age (years)                                               | II (III)<br>50 – 60                                                                                                                                                                                                                               | IV – V<br>40 – 50                                                                                                                                                                                                                                                                                                  | III – IV<br>40 – 50                                                                                                                                                                                                                                                                                              | IV<br>40 – 50                                                                                                                                                                                   |
| Number of trees, pcs.                                              | 16                                                                                                                                                                                                                                                | 52                                                                                                                                                                                                                                                                                                                 | 23                                                                                                                                                                                                                                                                                                               | 37                                                                                                                                                                                              |
| Number of undergrowth, pcs.                                        | 5                                                                                                                                                                                                                                                 | 10                                                                                                                                                                                                                                                                                                                 | -                                                                                                                                                                                                                                                                                                                | 7                                                                                                                                                                                               |
| Vitality according to Sukachev and Zonn                            | 1 – the species develops normally, reaches its normal size, goes through the entire cycle of its development, form fruit                                                                                                                          |                                                                                                                                                                                                                                                                                                                    |                                                                                                                                                                                                                                                                                                                  |                                                                                                                                                                                                 |
| Shrub / semishrub layer: height (h), m projective coverage (pc, %) | h = 0.5 – 3.5<br>pc = 10 – 15                                                                                                                                                                                                                     | h = 1 – 2.3<br>pc = 10                                                                                                                                                                                                                                                                                             | h = 0.5 – 5<br>pc = 20                                                                                                                                                                                                                                                                                           | h = 0.5 – 3.5<br>pc = 5                                                                                                                                                                         |
| Composition of shrub / semishrub layer                             | <i>Caragana halodendron</i> , <i>Nitraria schoberi</i> , <i>Tamarix ramosissima</i>                                                                                                                                                               | <i>Caragana halodendron</i> , <i>Berberis iliensis</i> , <i>Krascheninnikovi a ceratoides</i> , <i>Nitraria sibirica</i> , <i>Haloxylon ammodendron</i> , <i>Suaeda microphylla</i>                                                                                                                                | <i>Caragana halodendron</i> , <i>Berberis iliensis</i> , <i>Clematis orientalis</i> , <i>Tamarix ramosissima</i> , <i>Calligonum leucocladum</i> , <i>Lycium dasystemum</i> , <i>Atraphaxis spinosa</i>                                                                                                          | <i>Caragana halodendron</i> , <i>Berberis iliensis</i> , <i>Tamarix hispida</i> , <i>Tamarix laxa</i> , <i>Kalidium foliatum</i>                                                                |
| Composition of herbal layer, projective coverage (pc, %)           | <i>Eremopyrum bonaepartis</i> , <i>Leymus multicaulis</i> , <i>Lappula semiglabra</i> , <i>Tragopogon ruber</i> , <i>Taraxacum officinale</i> , <i>Cynanchum sibiricum</i> , <i>Cardaria draba</i> , <i>Sophora alopecuroides</i><br>pc = 60 – 70 | <i>Phragmites australis</i> , <i>Glycyrrhiza uralensis</i> , <i>Bolboschoenus planiculmis</i> , <i>Cynanchum acutum</i> subsp. <i>sibiricum</i> , <i>Asparagus persicus</i> , <i>Sophora alopecuroides</i> , <i>Lactuca serriola</i> , <i>Artemisia schrenkiana</i> , <i>Atriplex tatarica</i> , <i>Cynomorium</i> | <i>Neotrinia splendens</i> , <i>Phragmites australis</i> , <i>Leymus angustus</i> , <i>Elymus schrenkianus</i> , <i>Acroptilon australis</i> , <i>Ferula iliensis</i> , <i>Dodartia orientalis</i> , <i>Euphorbia soongarica</i> , <i>Artemisia schrenkiana</i> , <i>Glycyrrhiza uralensis</i> , <i>Lepidium</i> | <i>Calamagrostis epigeios</i> , <i>Phragmites australis</i> , <i>Artemisia schrenkiana</i> , <i>Glycyrrhiza glabra</i> , <i>Alhagi kirghisorum</i> , <i>Asparagus persicus</i><br>pc = 90 – 100 |

|                                                     |                                                                                                    |                                                                                                                                       |                                                                                                                                                                                                                                                                                                                             |                                                                                                |
|-----------------------------------------------------|----------------------------------------------------------------------------------------------------|---------------------------------------------------------------------------------------------------------------------------------------|-----------------------------------------------------------------------------------------------------------------------------------------------------------------------------------------------------------------------------------------------------------------------------------------------------------------------------|------------------------------------------------------------------------------------------------|
|                                                     |                                                                                                    | <i>coccineum</i> subsp.<br><i>songaricum</i> ,<br><i>Chenopodium</i><br><i>album</i> , <i>Leymus</i><br><i>multicaulis</i><br>pc = 90 | <i>latifolium</i> ,<br><i>Hyoscyamus</i><br><i>niger</i> , <i>Anabasis</i><br><i>aphylla</i> ,<br><i>Cynanchum</i><br><i>acutum</i> subsp.<br><i>sibiricum</i> , <i>Galium</i><br><i>aparine</i> , <i>Vicia</i><br><i>cracca</i> , <i>Bunium</i><br><i>setaceum</i> ,<br><i>Andrachne</i><br><i>telephioides</i><br>pc = 70 |                                                                                                |
| Species richness                                    | 5.0                                                                                                | 5.6                                                                                                                                   | 9.7                                                                                                                                                                                                                                                                                                                         | 4.7                                                                                            |
| Factors and degree of anthropogenic disturbance     | background, weak zoogenic influence (rodent burrows)                                               | week                                                                                                                                  | week                                                                                                                                                                                                                                                                                                                        | grazing / medium                                                                               |
| The Syr Darya River Valley                          |                                                                                                    |                                                                                                                                       |                                                                                                                                                                                                                                                                                                                             |                                                                                                |
| Coordinates, height above sea level                 | N 44°14' E 66°37'<br>105 m                                                                         | N 44°14' E<br>66°33'<br>104 m                                                                                                         | N 44°14' E<br>66°32'<br>100 m                                                                                                                                                                                                                                                                                               | N 44°14' E<br>66°31'<br>107 m                                                                  |
| Relief                                              | above-floodplain terrace, riverine ramparts                                                        |                                                                                                                                       |                                                                                                                                                                                                                                                                                                                             |                                                                                                |
| Soils                                               | floodplain meadow-forest                                                                           |                                                                                                                                       |                                                                                                                                                                                                                                                                                                                             |                                                                                                |
| Plant community                                     | forb-grass-turanga                                                                                 |                                                                                                                                       |                                                                                                                                                                                                                                                                                                                             | forb-grass-turanga with shrubs                                                                 |
| Total projective coverage, %                        | 90-100                                                                                             | 90-100                                                                                                                                | 90-100                                                                                                                                                                                                                                                                                                                      | 90                                                                                             |
| Size of the test site, m                            | 30 × 30                                                                                            | 30 × 30                                                                                                                               | 30 × 30                                                                                                                                                                                                                                                                                                                     | 30 × 30                                                                                        |
| Tree layer: height (h), m, average diameter (d), cm | h = 10 – 20, d = 7                                                                                 | h = 5, d = 12                                                                                                                         | h = 7 – 10, d = 14                                                                                                                                                                                                                                                                                                          | h = 4, d = 4                                                                                   |
| Composition of the stand                            | <i>Populus pruinosa</i>                                                                            | <i>Populus pruinosa</i>                                                                                                               | <i>Populus pruinosa</i> ,<br><i>Elaeagnus angustifolia</i>                                                                                                                                                                                                                                                                  | <i>Populus pruinosa</i>                                                                        |
| Closeness of the stand                              | 0.8 – 1.0                                                                                          | 0.7 – 0.9                                                                                                                             | 0.8 – 0.9                                                                                                                                                                                                                                                                                                                   | 0.7 – 0.8                                                                                      |
| Bonitet, age (years)                                | IV – V<br>40 – 50                                                                                  | IV (V – Va – Vb)<br>40 – 50                                                                                                           | V – Va – Vb<br>50 – 55                                                                                                                                                                                                                                                                                                      | V – Va – Vb<br>10 – 15 (30)                                                                    |
| Number of trees, pcs.                               | 88                                                                                                 | 88                                                                                                                                    | 66                                                                                                                                                                                                                                                                                                                          | 46                                                                                             |
| Number of undergrowth, pcs.                         | -                                                                                                  | 21                                                                                                                                    | -                                                                                                                                                                                                                                                                                                                           | -                                                                                              |
| Vitality according to Sukachev and Zonn             | 2 – weakening with insufficient vegetative development and not passing the entire large life cycle | 1 – the species develops normally, reaches its normal size, goes through the entire cycle of its development                          | 2 – the species goes through all stages of its development, but does not reach its normal size                                                                                                                                                                                                                              | 2 – the species goes through all stages of its development, but does not reach its normal size |
| Shrub / semishrub layer: height (h), m              | h = 1 – 1.5<br>pc = 10                                                                             | h = 1<br>pc = 10                                                                                                                      | h = 1.5<br>pc = 40                                                                                                                                                                                                                                                                                                          | h = 1 – 1.7<br>pc = 15 – 30                                                                    |

|                                                          |                                                                                                                                                                                                                                                                                                                                                                                                                 |                                                                                                                                                                                                                                                                                                     |                                                                                                                                                                                                                                                                                                                                                                                                                                                                                                                                                                     |                                                                                                                                                                                                                                                                                                                                      |
|----------------------------------------------------------|-----------------------------------------------------------------------------------------------------------------------------------------------------------------------------------------------------------------------------------------------------------------------------------------------------------------------------------------------------------------------------------------------------------------|-----------------------------------------------------------------------------------------------------------------------------------------------------------------------------------------------------------------------------------------------------------------------------------------------------|---------------------------------------------------------------------------------------------------------------------------------------------------------------------------------------------------------------------------------------------------------------------------------------------------------------------------------------------------------------------------------------------------------------------------------------------------------------------------------------------------------------------------------------------------------------------|--------------------------------------------------------------------------------------------------------------------------------------------------------------------------------------------------------------------------------------------------------------------------------------------------------------------------------------|
| projective coverage (pc, %)                              |                                                                                                                                                                                                                                                                                                                                                                                                                 |                                                                                                                                                                                                                                                                                                     |                                                                                                                                                                                                                                                                                                                                                                                                                                                                                                                                                                     |                                                                                                                                                                                                                                                                                                                                      |
| Composition of shrub / semishrub layer                   | <i>Caragana halodendron</i> ,<br><i>Tamarix ramosissima</i>                                                                                                                                                                                                                                                                                                                                                     | <i>Caragana halodendron</i> ,<br><i>Tamarix ramosissima</i>                                                                                                                                                                                                                                         | <i>Caragana halodendron</i> ,<br><i>Tamarix ramosissima</i> ,<br><i>Halostachys belangeriana</i>                                                                                                                                                                                                                                                                                                                                                                                                                                                                    | <i>Caragana halodendron</i> ,<br><i>Halostachys belangeriana</i>                                                                                                                                                                                                                                                                     |
| Composition of herbal layer, projective coverage (pc, %) | <i>Leymus multicaulis</i> ,<br><i>Aeluropus littoralis</i> ,<br><i>Atriplex sagittata</i> ,<br><i>Limonium otolepis</i> ,<br><i>Petrosimonia sibirica</i> ,<br><i>Suaeda altissima</i> ,<br><i>Climacoptera lanata</i> ,<br><i>Glycyrrhiza glabra</i> ,<br><i>Pseudosophora alopecuroides</i> ,<br><i>Taraxacum bessarabicum</i> ,<br><i>Artemisia schrenkiana</i> ,<br><i>Karelinia caspia</i><br>pc = 70 – 80 | <i>Leymus multicaulis</i> ,<br><i>Atriplex sagittata</i> ,<br><i>Petrosimonia sibirica</i> ,<br><i>Suaeda microphylla</i> ,<br><i>Climacoptera lanata</i> ,<br><i>Limonium otolepis</i> ,<br><i>Glycyrrhiza glabra</i> ,<br><i>Karelinia caspia</i> ,<br><i>Polygonum aviculare</i><br>pc = 50 – 60 | <i>Leymus multicaulis</i> ,<br><i>Aeluropus littoralis</i> ,<br><i>Atriplex sagittata</i> ,<br><i>A. tatarica</i> ,<br><i>Petrosimonia sibirica</i> ,<br><i>Suaeda altissima</i> ,<br><i>Climacoptera lanata</i> ,<br><i>Taraxacum bessarabicum</i> ,<br><i>Limonium otolepis</i> ,<br><i>Zygophyllum fabago</i> ,<br><i>Sophora alopecuroides</i> ,<br><i>Artemisia schrenkiana</i> ,<br><i>Glycyrrhiza glabra</i> ,<br><i>Karelinia caspia</i> ,<br><i>Asparagus breslerianus</i> ,<br><i>Polygonum aviculare</i> ,<br><i>Clematis orientalis</i><br>pc = 50 – 60 | <i>Leymus multicaulis</i> ,<br><i>Aeluropus littoralis</i> ,<br><i>Atriplex sagittata</i> ,<br><i>Limonium otolepis</i> ,<br><i>Petrosimonia sibirica</i> ,<br><i>Suaeda altissima</i> ,<br><i>Climacoptera lanata</i> ,<br><i>Zygophyllum fabago</i> ,<br><i>Asparagus breslerianus</i> ,<br><i>Saussurea salsa</i><br>pc = 30 – 40 |
| Species richness                                         | 5.1                                                                                                                                                                                                                                                                                                                                                                                                             | 4.1                                                                                                                                                                                                                                                                                                 | 7.5                                                                                                                                                                                                                                                                                                                                                                                                                                                                                                                                                                 | 4.4                                                                                                                                                                                                                                                                                                                                  |
| Factors and degree of anthropogenic disturbance          | grazing / weak, medium                                                                                                                                                                                                                                                                                                                                                                                          | grazing / medium                                                                                                                                                                                                                                                                                    | grazing / medium                                                                                                                                                                                                                                                                                                                                                                                                                                                                                                                                                    | grazing / medium                                                                                                                                                                                                                                                                                                                     |

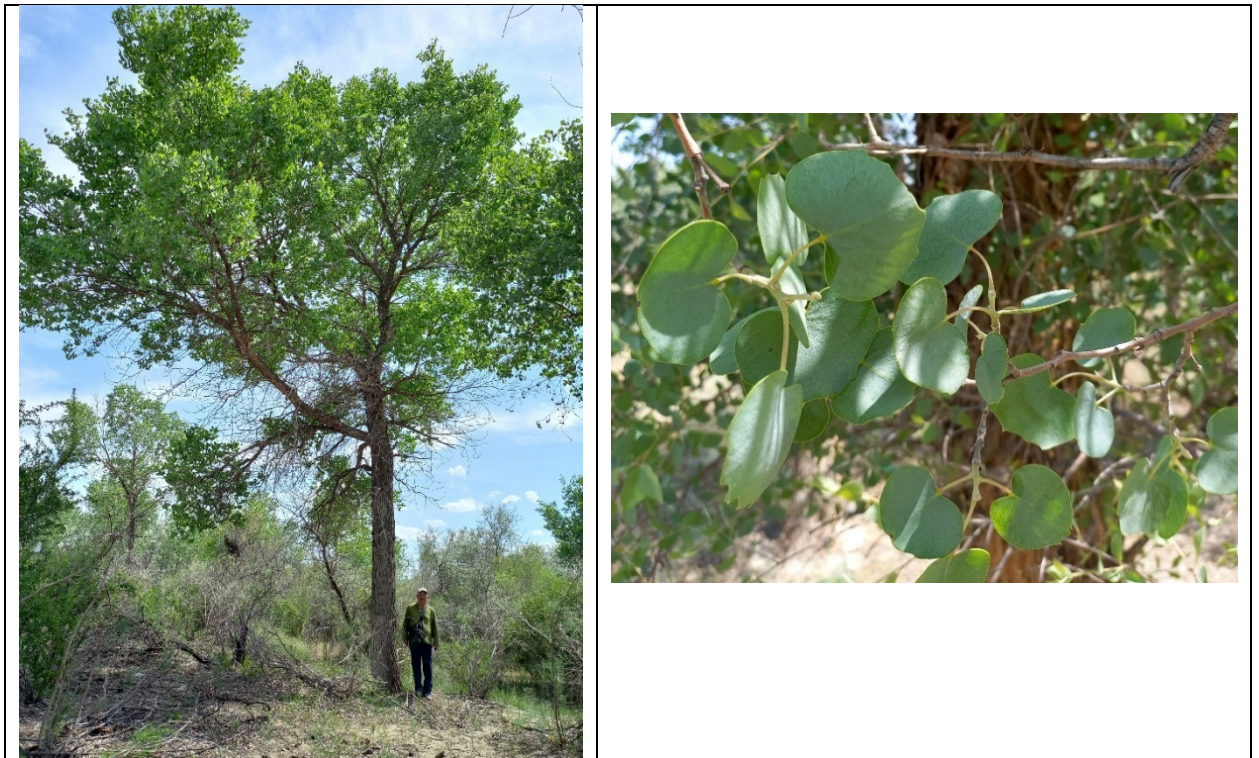

**Figure S1.** *Populus pruinosa* Schrenk

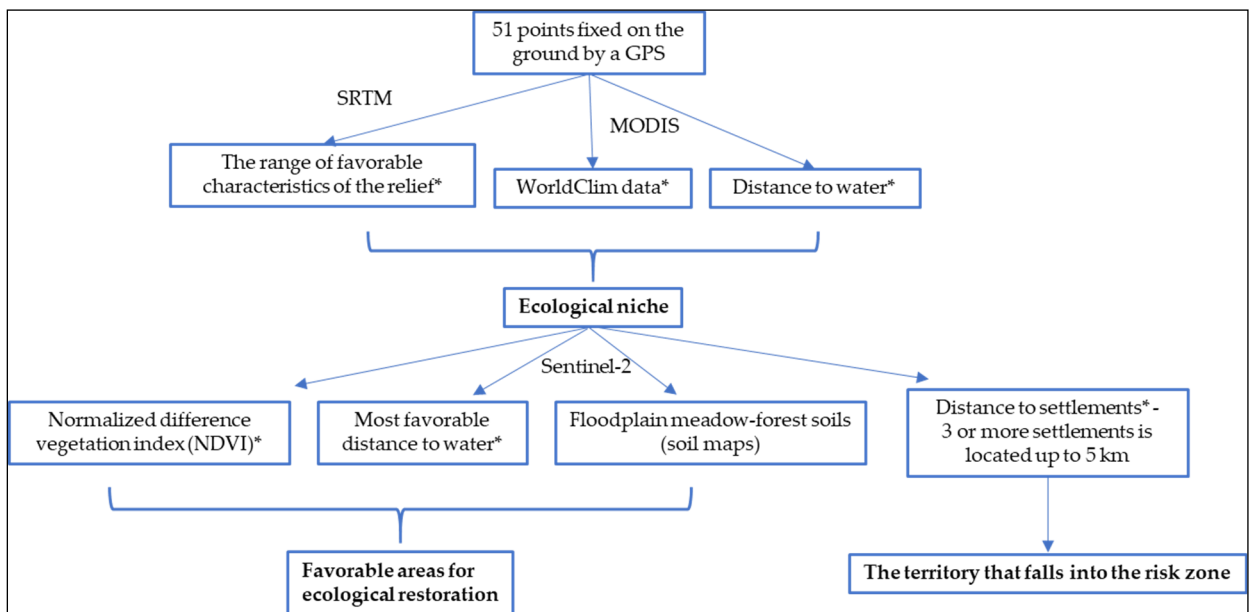

**Figure S2.** Flow charts of calculations for ecological niche mapping, detection of favorable areas for ecological restoration and the territory that falls into the risk zone.

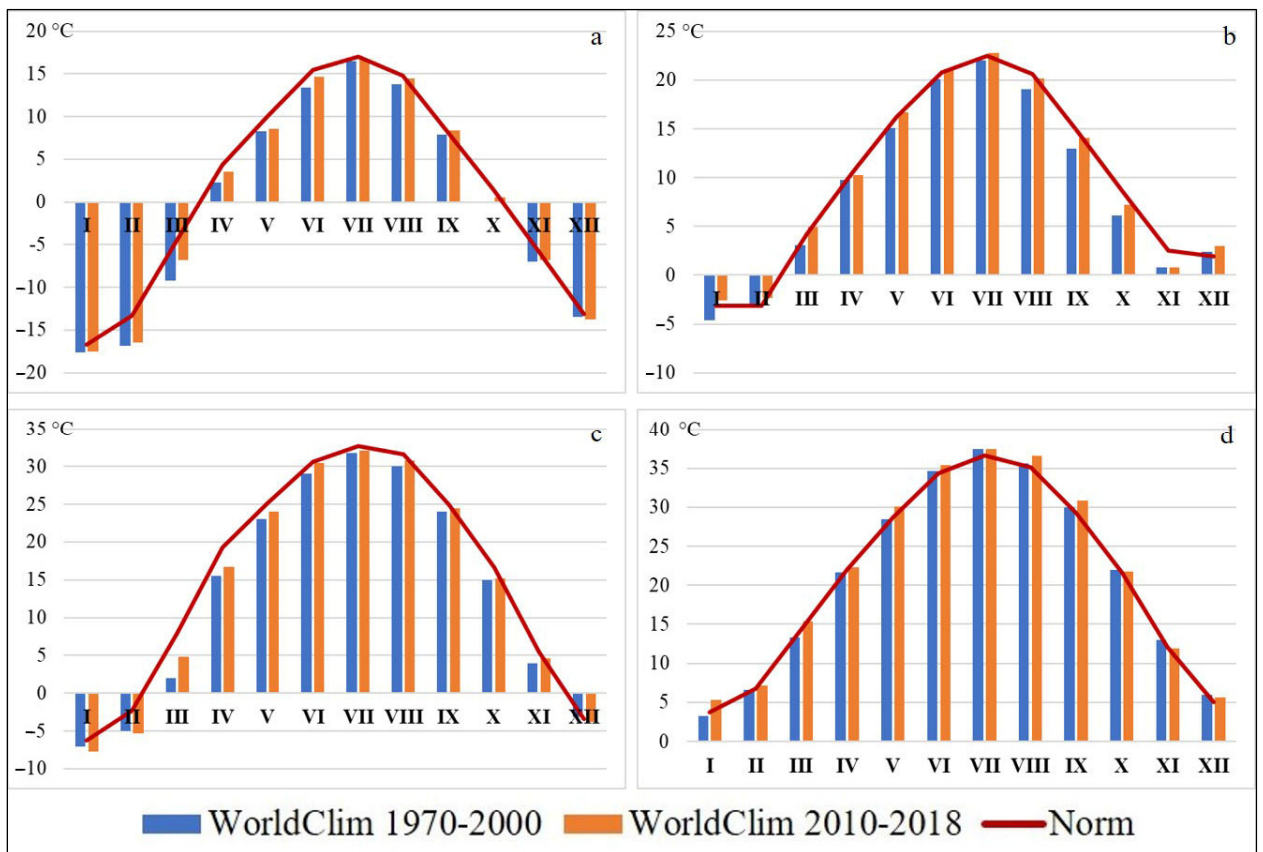

**Figure S3.** Correlation between temperature: [a] Lower limits for minimum temperatures; [b] Upper limits for minimum temperatures; [c] Lower limits for maximum temperatures; [d] Upper limits for maximum temperatures. I–XII – months.

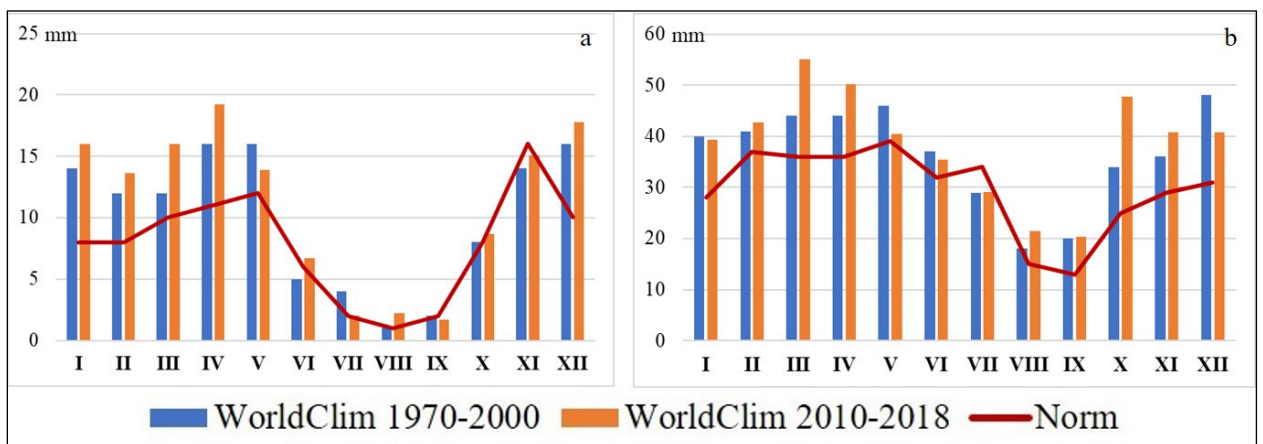

**Figure S4.** Correlation between precipitation: [a] Lower limits of precipitation; [b] Upper limits of precipitation. I–XII – months.
